# Supplementary material for: Epigenomic and Functional Characterization of Junctophilin 3 (JPH3) as a Novel Tumor Suppressor Being Frequently Inactivated by Promoter CpG Methylation in Digestive Cancers
Source: PubMed Central journal article supplement — Theranostics. 2017 May 30;7(7):2150–63. doi: 10.7150/thno.18185 (PMC5485426; doi:10.7150/thno.18185), 2017-05-30

## **Supplementary information**

### **Supplementary Materials and Methods**

**Semi-quantitative RT-PCR and quantitative PCR.** Semi-quantitative RT-PCR and quantitative PCR (qPCR) was performed as described previously (1). GAPDH was also amplified as an internal control. Primers used are listed in Suppl. Table S1.

**Immunohistochemistry.** The ChemMate EnVision Detection Kit (DAKO, Carpinteria, CA) was used for immunohistochemistry according to company's recommended procedure. JPH3 protein expression in tumor cells was scored based on the intensity of cytoplasmic staining using a 4-point system: 0, negative; 1, weakly positive; 2, positive and 3, strongly positive. To examine the association of JPH3 expression level with clinicopathological features, patients were divided into two groups: low JPH3 expression (0 and 1) or high JPH3 expression (2 and 3). Immunostaining was scored independently on separate occasions by two investigators who were blinded to the clinical information of patients, using JPH3 expression level in normal cells as a baseline.

**Colony formation assays.** For colony formation assays with monolayer culture, cells ( $2 \times 10^5$ /well) were plated in a 12-well plate and transfected with JPH3-expression plasmid or empty vector (3 $\mu$ g each) using MegaTran 1.0 transfection reagent (Origene, Maryland, MD). Cells were collected and plated in a 10-cm dish 48 hours post-transfection, and selected for 16–20 days with G418 (0.6 mg/ml). Surviving colonies ( $\geq 50$  cells/colony) were counted after Giemsa staining.

For soft agar assay, approximately ~500 stable transfected cells were suspended in medium containing 0.3% low-melt agarose, seeded into a six-well plate overlaid with 0.5% low-melt agarose, and allowed to grow for 2 weeks at 37°C in 5% CO<sub>2</sub>. Colonies containing more than 50 cells were counted under a microscope. Three wells were analyzed for each experiment.

**Wound-healing assay.** Cell motility was assessed using a scratch wound assay. Stably transfected cells were cultured in 35 mm dishes until confluent. A single scratch was produced in the cell layer using a sterile tip and washed twice with fresh medium. After incubation for 24 and 48 hours, the cells were photographed under a phase contrast microscope. The experiments were performed in triplicate.

**Transwell cell migration assay.** Cells were trypsinized and resuspended in corresponding medium containing 1% fetal bovine serum at a density of  $1 \times 10^6$  cells/ml. Cell suspension (100 µl) was added into the upper chamber of a transwell plate (Corning, NY, U.S.) consisting of inserts containing PET membranes with 8-µm pores. Medium (600 µl) containing 10% fetal bovine serum was placed in the lower chamber. After 48-hour incubation at 37°C, cells remaining in the upper chamber were removed carefully with a cotton swab and the membrane was removed using operating surgical knife. The side facing the lower chamber was stained with 0.05% crystal violet and the attached cells were counted under a light microscope. The experiment was performed in triplicate.

**Apoptosis assay.** Percentage of apoptosis was measured using the Annexin V-FITC Apoptosis Detection Kit I (BD Clontech, Palo Alto, CA) with flow cytometry according

to the manufacturer's instruction.

**Western blot analysis.** Cells were harvested from cultured dishes and lysed in lysis buffer (20 mM Tris-HCl pH 7.6, 1 mM EDTA, 140 mM NaCl, 1% NP-40, 1% aprotinin, 1 mM phenylemethanesulfonyl fluoride (PMSF), 1 mM sodium vanadate). Protein concentration was determined using a BCA Protein Assay Kit (Pierce Chemical Co., Rockford, IL, U.S.). Cell lysates (40 µg protein/line) were separated on a 5 to 20% SDS-PAGE gel for nitrocellulose membrane blotting. Blotted membranes were blocked with 5% skim milk for 1 hour and incubated with primary antibodies which are listed in Suppl. Table S2, respectively. Detection was carried out using the ECL kit (Pierce Chemical Co., Rockford, IL) and the blots were developed using a Fujifilm Las-4000 Imaging System.

**AIF and p53 immunofluorescence.** Cells grown on coverslips were fixed in methanol, incubated with an anti-AIF or an anti-p53 antibody, and detected by anti-rabbit immunoglobulin G (IgG) conjugated with Alexa Fluor 594 (Invitrogen). Nuclei were stained with DAPI, and the red and blue fluorescence was observed with a Fluorescence microscope (Olympus BX51).

**Supplementary Table 1. PCR primers used in the study**

| <b>Primers</b>                                         | <b>Sequences (5'-3')</b> | <b>Product size (bp)</b> |
|--------------------------------------------------------|--------------------------|--------------------------|
| <b>For JPH3 RT-PCR</b>                                 |                          |                          |
| JPH3-F                                                 | AATCCTTGCCTGTCGCTCTA     | v1 and v4: 292           |
| JPH3-R                                                 | CCCAATCGTGTGGTTCTTCT     |                          |
| JPH3-F2                                                | AAT ACG AAGGGACCTGGAGC   | v2: 296                  |
| JPH3-R2                                                | GTTTGTGGGGTCTGGCTT       | v3: 442                  |
| <b>For detecting methylated JPH3 promoter by MSP</b>   |                          |                          |
| JPH3-m3                                                | AGACGTTGGTTAGGTTTCGC     | 119                      |
| JPH3-m4                                                | CGCGACCCCGAAACGCG        |                          |
| <b>For detecting unmethylated JPH3 promoter by MSP</b> |                          |                          |
| JPH3-u3                                                | GAGATGTTGGTTAGGTTTTGT    | 124                      |
| JPH3-u4                                                | AAAACACAACCCCAAACACA     |                          |
| <b>For BGS analysis of JPH3 methylation</b>            |                          |                          |
| JPH3-BGS1                                              | GGTTTTTAATATGGTGTAGT     | 554                      |
| JPH3-BGS2                                              | AAATTAAACCTACCCCACTAA    |                          |
| <b>Control for RT-PCR</b>                              |                          |                          |
| GAPDH-F                                                | TCCTGTGGCATCCACGAAACT    | 496                      |
| GAPDH-R                                                | GAAGCATTGCGGTGGACGAT     |                          |
| <b>Control for qPCR</b>                                |                          |                          |
| HPRT1-qPCR-F                                           | AGACTTTGCTTTCCTTGGTCAG   | 151                      |
| HPRT1-qPCR-R                                           | TCAAGGGCATATCCTACAACAA   |                          |

**Supplementary Table 2. Antibodies used in the paper**

| <b>Antibody</b> | <b>Catalogue number</b> | <b>Company</b>            |
|-----------------|-------------------------|---------------------------|
| TRB3            | sc-271572               | Santa Cruz                |
| CHOP            | 2895                    | Cell Signaling Technology |
| Bip             | 3177                    | Cell Signaling Technology |
| IRE1a           | 3294                    | Cell Signaling Technology |
| Ero1-La         | 3264                    | Cell Signaling Technology |
| PERK            | 5683                    | Cell Signaling Technology |
| Caspase 3       | BS7004                  | Bioworld                  |
| Caspase 9       | sc-8355                 | Santa Cruz                |
| Cleaved PARP    | 556494                  | BD                        |
| Caspase 4       | 4450                    | Cell Signaling Technology |
| Caspase 7       | 12827                   | Cell Signaling Technology |
| Caspase 8       | 9746                    | Cell Signaling Technology |
| Cyto C          | 556433                  | BD                        |
| Smac            | 2409                    | ProSci                    |
| AIF             | 5318                    | Cell Signaling Technology |
| Bcl2            | 2870                    | Cell Signaling Technology |
| p-Bcl2 (Ser70)  | 2827                    | Cell Signaling Technology |
| Mcl-1           | 5453                    | Cell Signaling Technology |
| Bcl-XL          | 2764                    | Cell Signaling Technology |
| Bid             | 2002                    | Cell Signaling Technology |
| Bad             | 9237                    | Cell Signaling Technology |
| Bax             | 5023                    | Cell Signaling Technology |
| Bak             | 12105                   | Cell Signaling Technology |
| Pan-Akt         | AA326                   | Beyotime                  |
| p-Akt (Ser473)  | AA329                   | Beyotime                  |
| p-JNK           | AJ516                   | Beyotime                  |
| p-p38           | AM063                   | Beyotime                  |
| p-p44/42        | AM071                   | Beyotime                  |
| p53             | sc-126                  | Santa Cruz                |
| GAPDH           | 2118                    | Cell Signaling Technology |
| Tubulin         | 2144                    | Cell Signaling Technology |

## Supplementary figure legends

**Supplementary figure 1.** (A) Structure of the *JPH3* gene and reported transcript splices. Expression of *JPH3* transcript variants and *JPH4* in (B) CRC and gastric tumor cell lines and (C) primary tumors, measured by semi-quantitative RT-PCR. CRC, colorectal cancer; GsCa, gastric cancer.

**Supplementary figure 2.** (A) Gene location of *JPH3* on Chr 16. (B) The sequence of *JPH3* promoter and exon 1 is indicated (-529 bp to +44 bp). The 81 CpG sites sequenced in *JPH3* promoter and exon 1 are highlighted in bold. The positions of forward and reverse primers used for BGS and MSP analyses are underlined. The transcription initiation site is indicated by a bent arrow. The translation start site (ATG) is boxed. The MSP and BGS primers with green names underlined are used in the study.

**Supplementary figure 3.** Endogenous and ectopic expression of *JPH3* in colorectal and gastric cell lines as measured by qPCR. CRC, colorectal cancer.

**Supplementary figure 4.** Ectopic *JPH3* expression had no apparent effect on p53 translocation. Expression shown by immunofluorescence and Western blot in (A) HCT116 and (B) MKN-28 cells.

## Reference

1. Hu X, Sui X, Li L, Huang X, Rong R, Su X, Shi Q, Mo L, Shu X, Kuang Y, et al. Protocadherin 17 acts as a tumour suppressor inducing tumour cell apoptosis

and autophagy, and is frequently methylated in gastric and colorectal cancers.  
*J Pathol.* 2013;229(1):62-73.

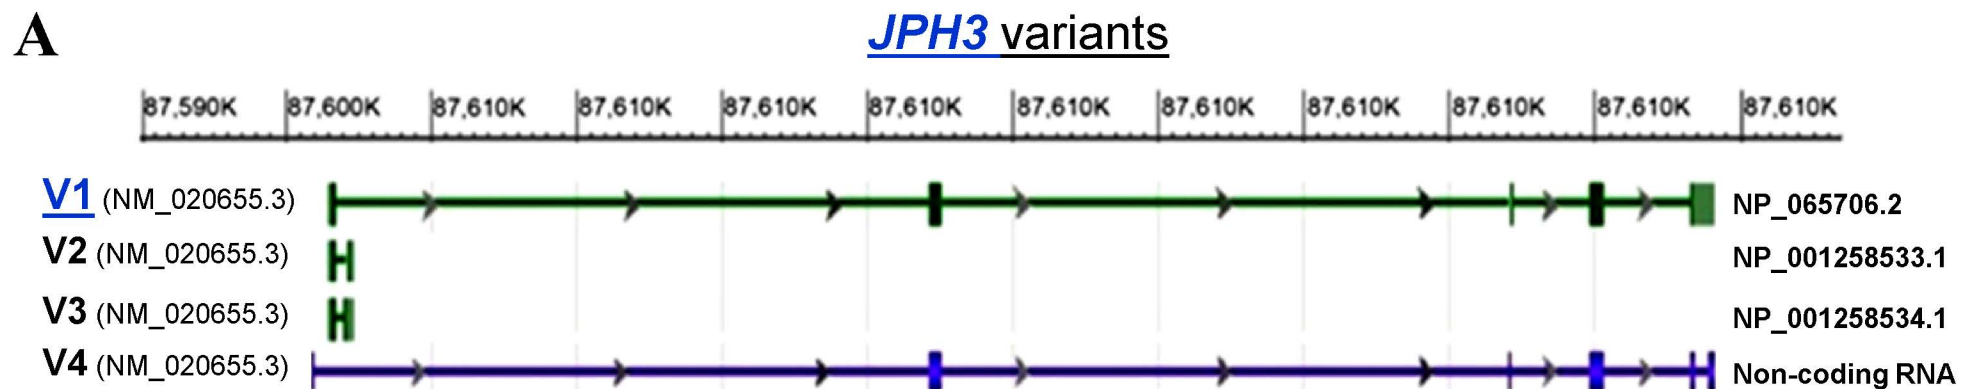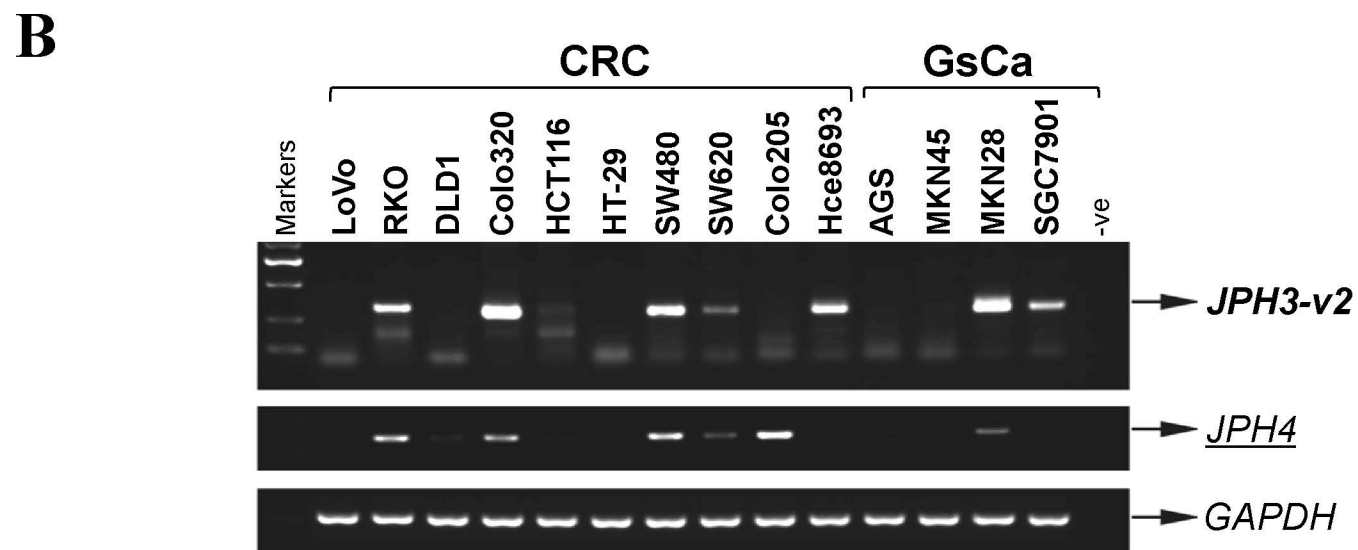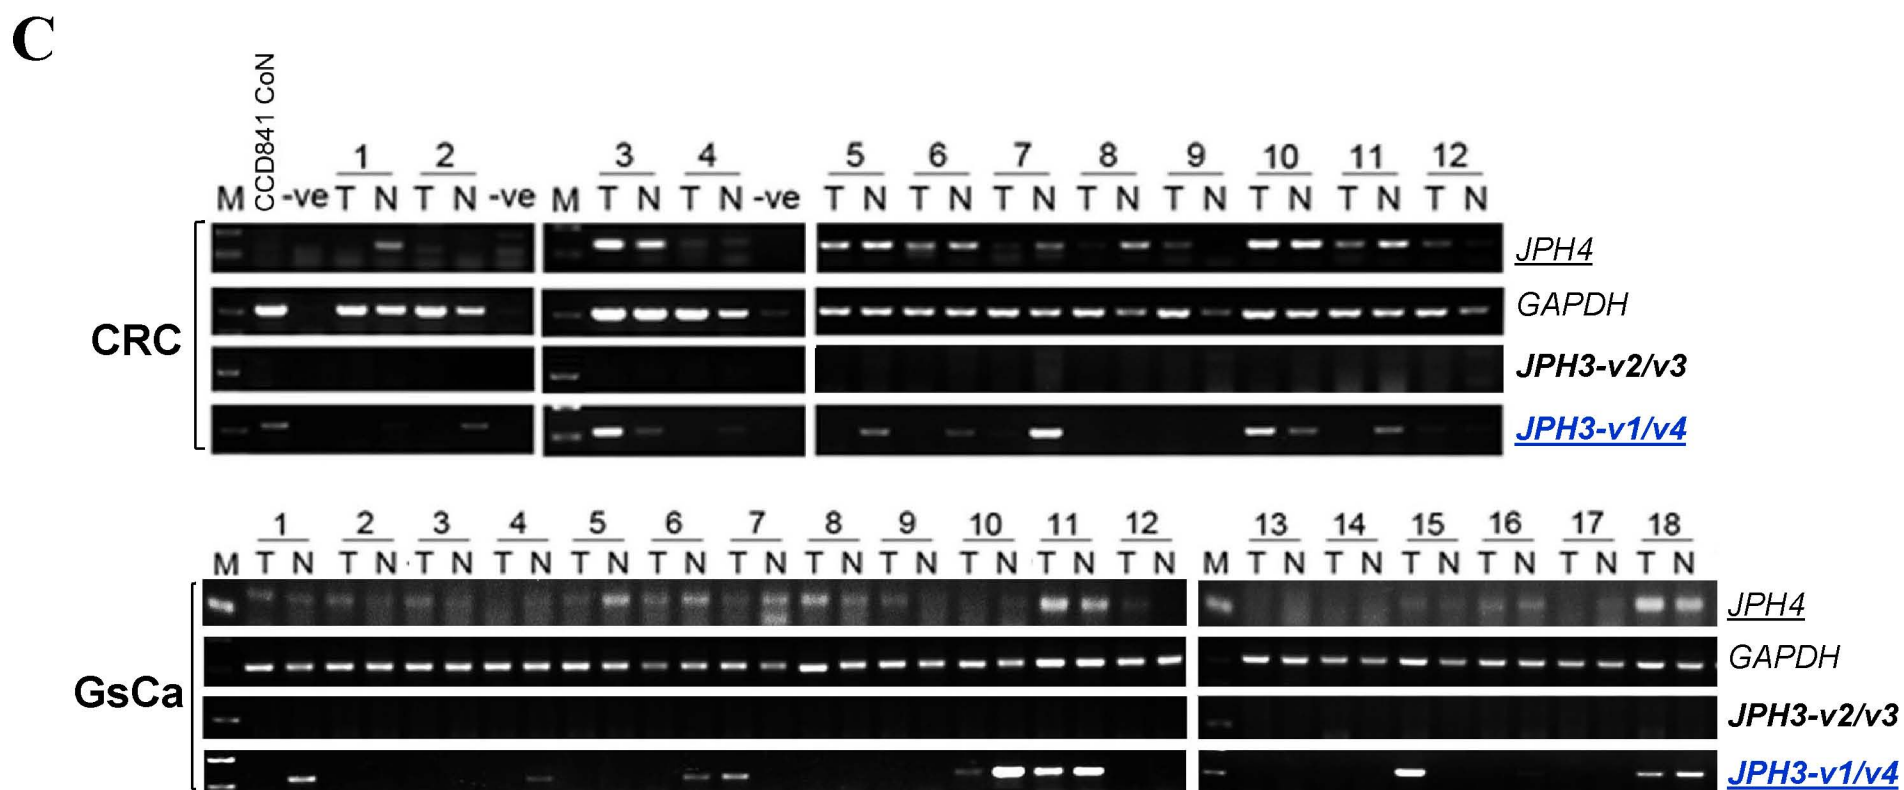



A

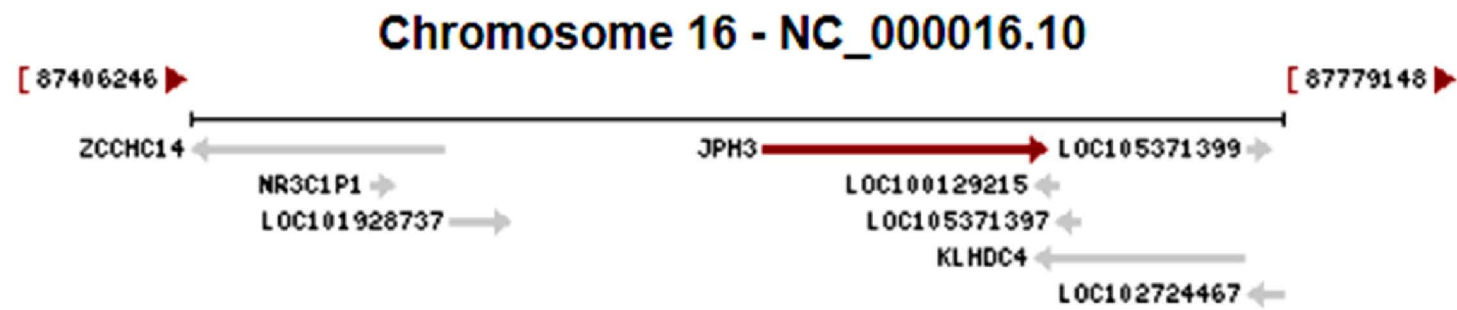

B

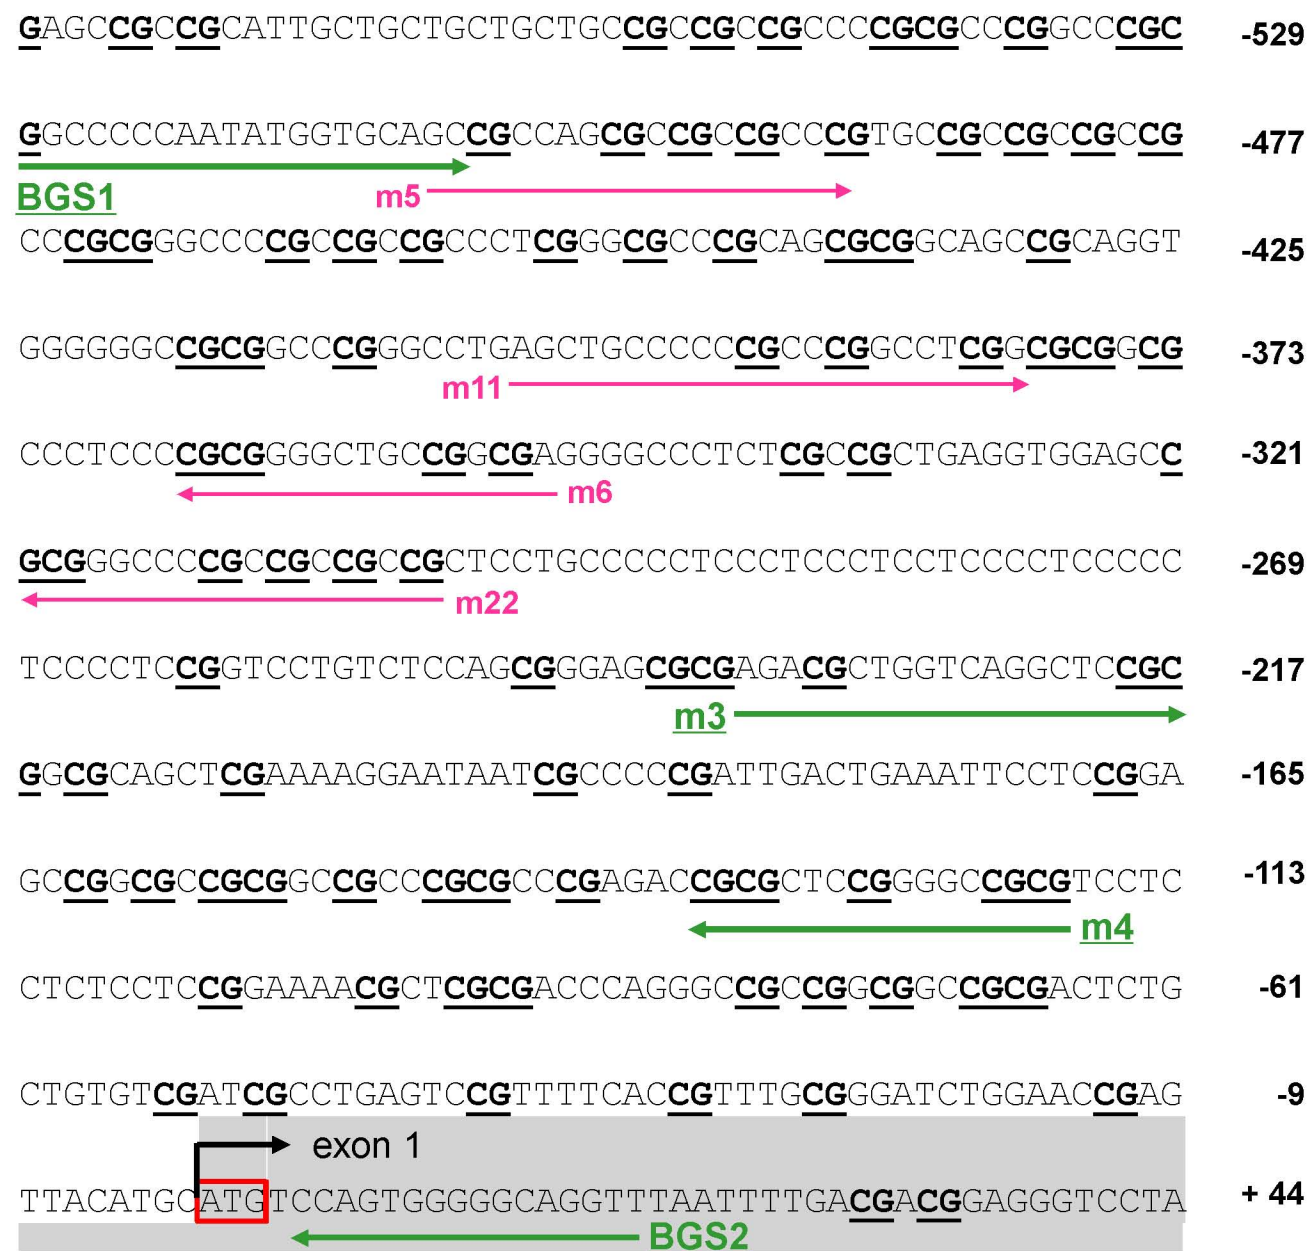

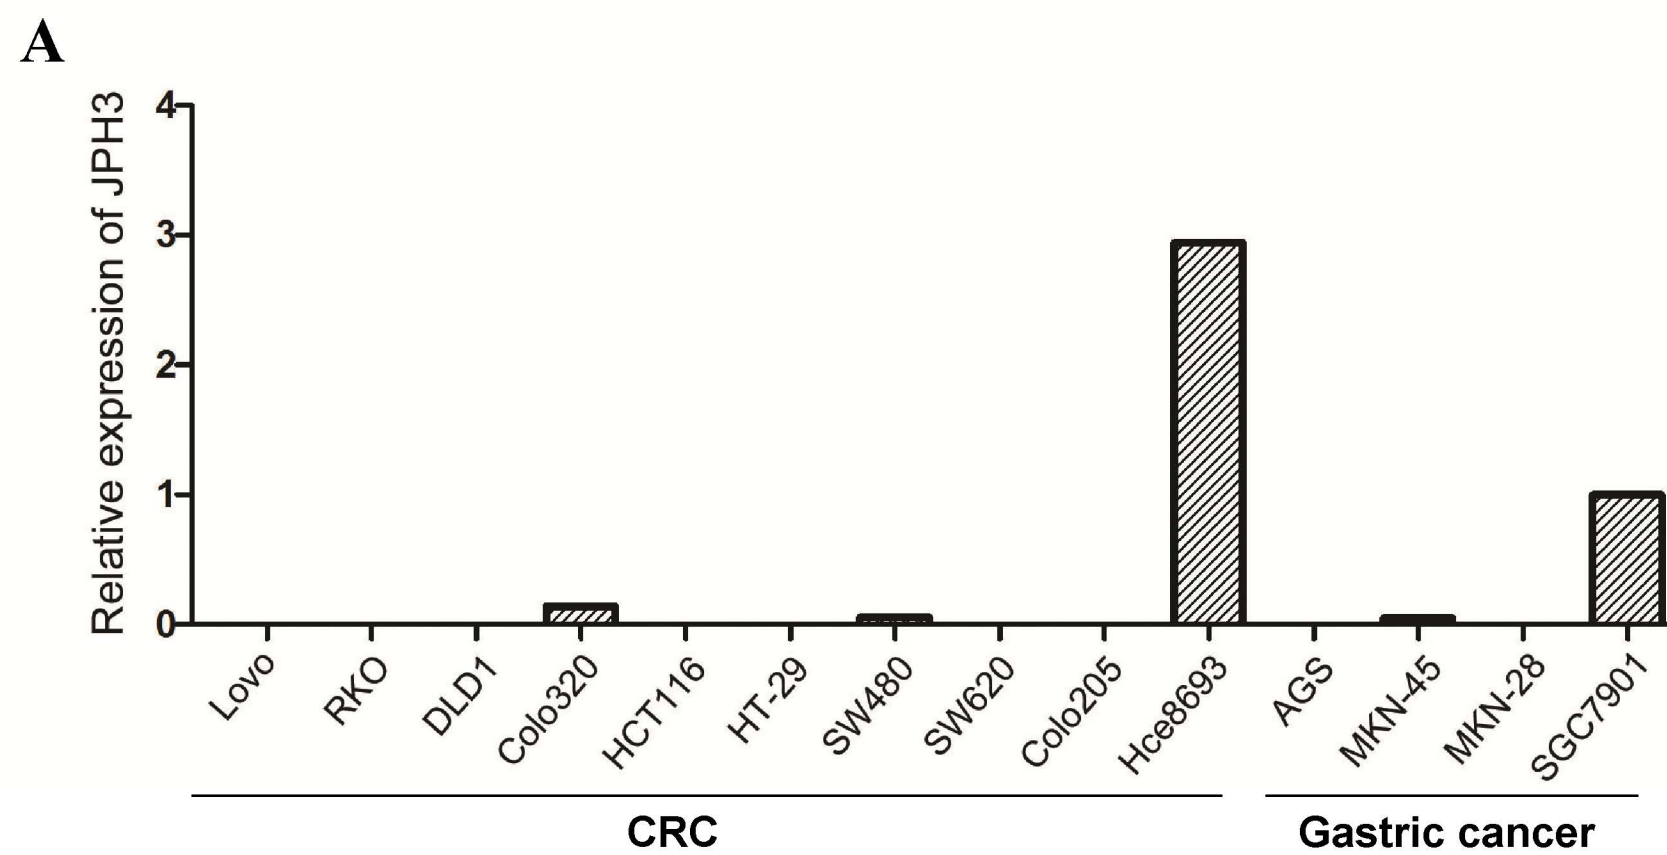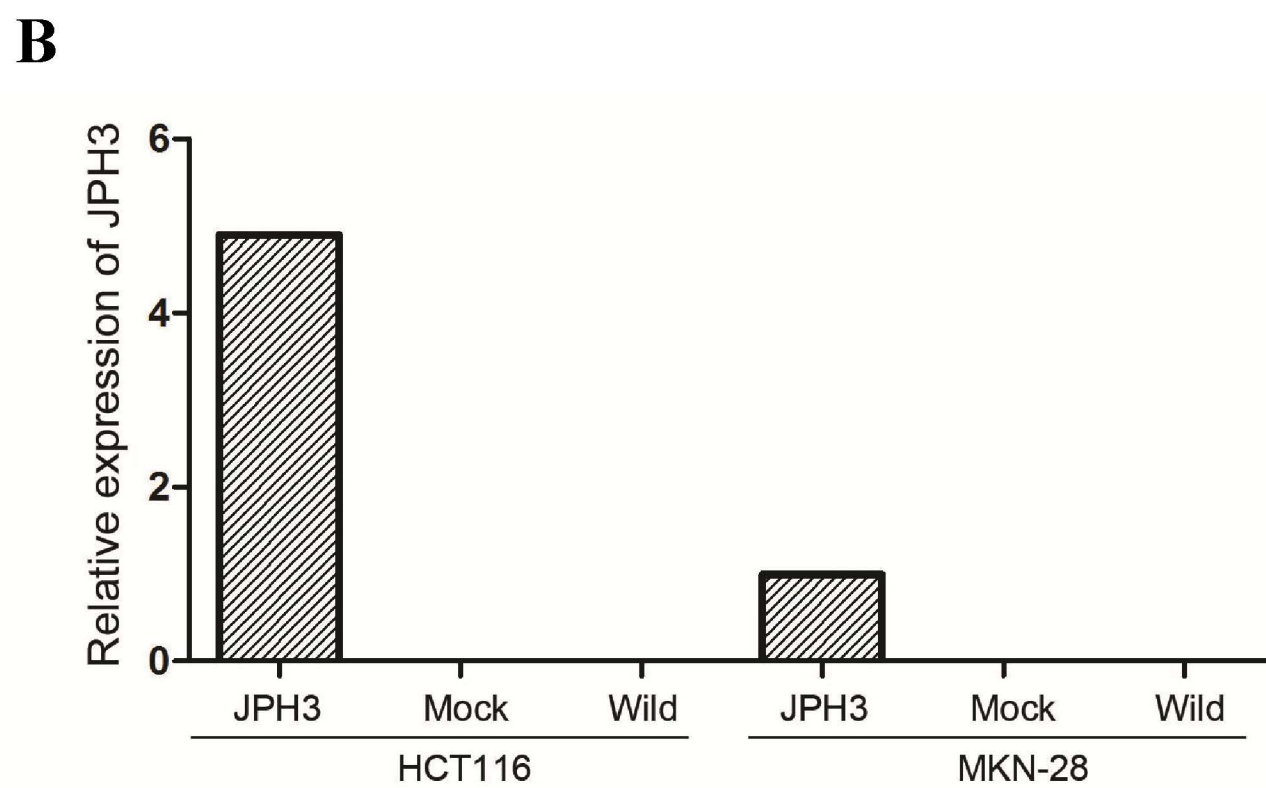

**A**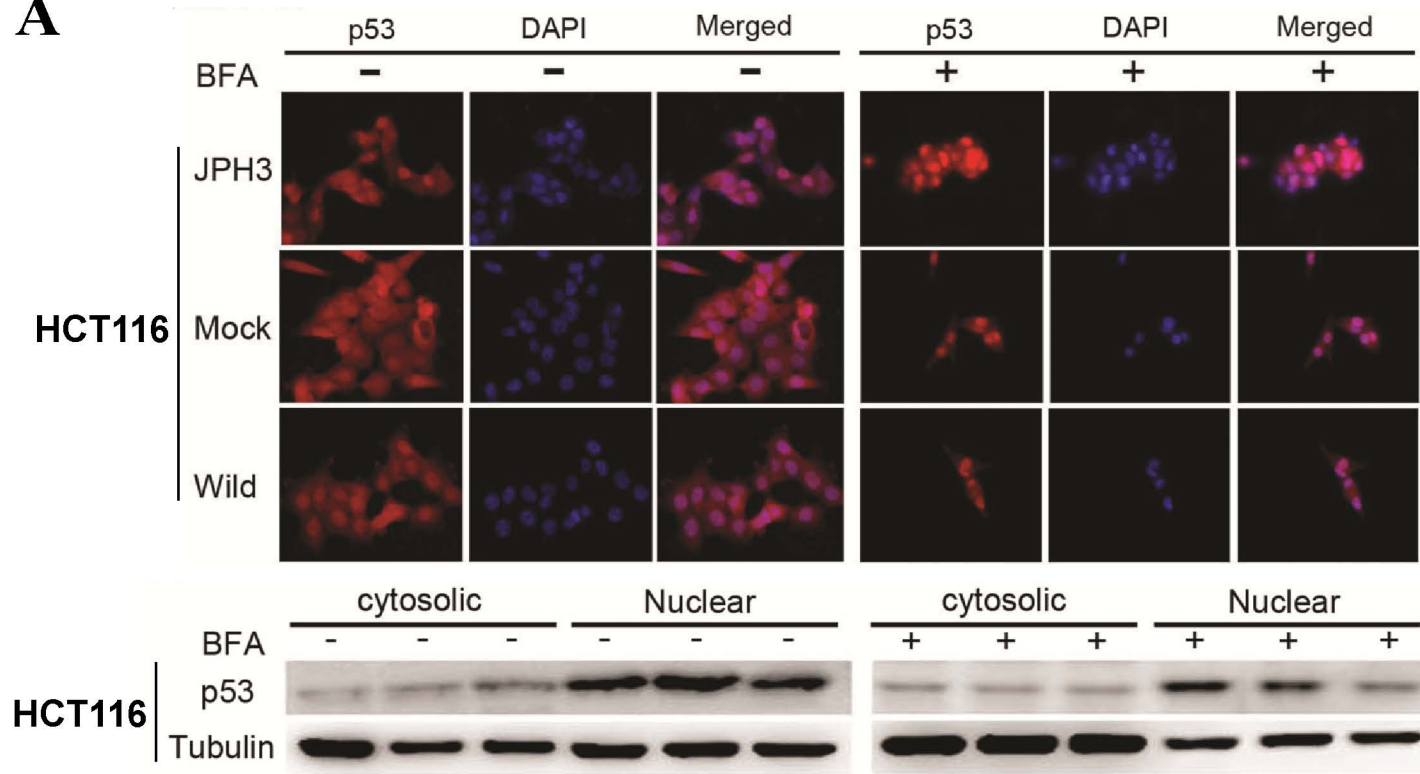**B**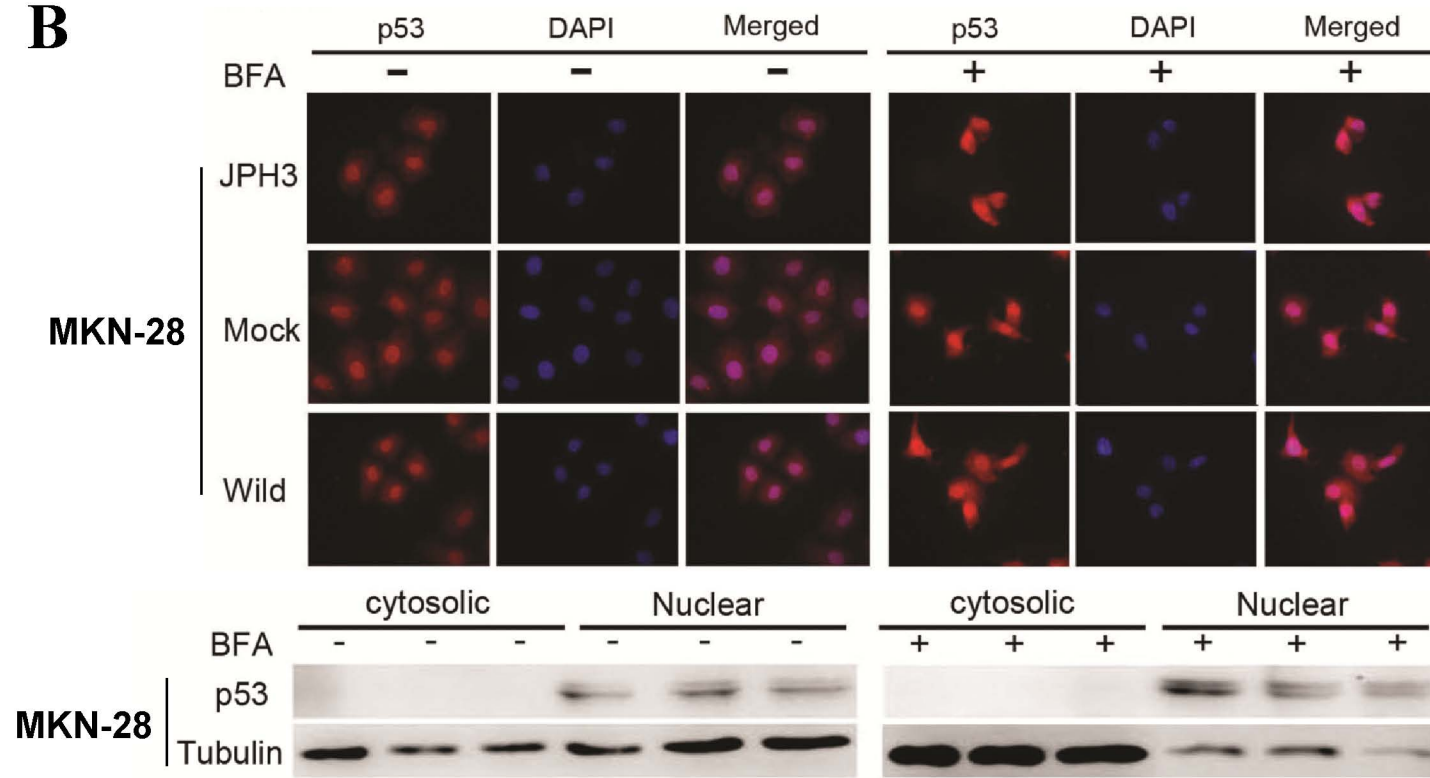

Supplement: thnov07p2150s1.pdf [file thnov07p2150s1.pdf]
